# Supplementary material for: Bicyclic nucleosides; stereoselective dihydroxylation and 2′-deoxygenationElectronic supplementary information (ESI) available: 13C NMR spectra for compounds 7, 8 and 17 as well as 1H NMR data spectra for compounds 5, 11 and 18. See http://www.rsc.org/suppdata/ob/b2/b210439c/
Source: Royal Society of Chemistry journal article supplement (doi:10.1039/b210439c), 2003-02-11
Supplement: b210439c.pdf [file b210439c.pdf]

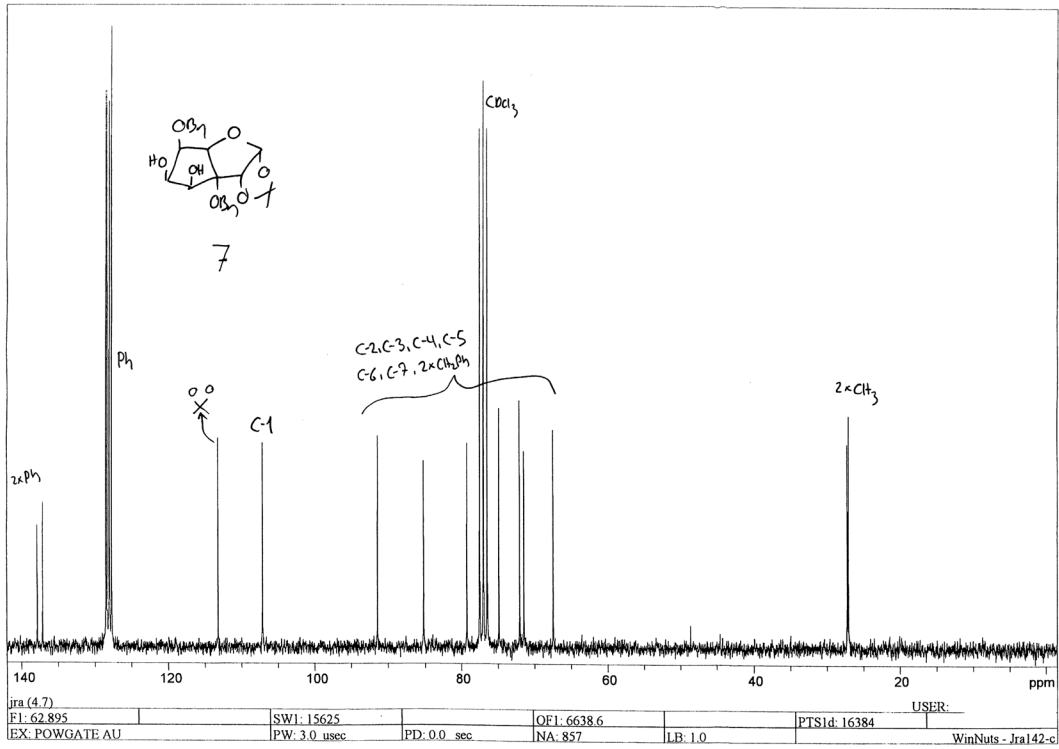

<sup>13</sup>C NMR spectrum of compound 7

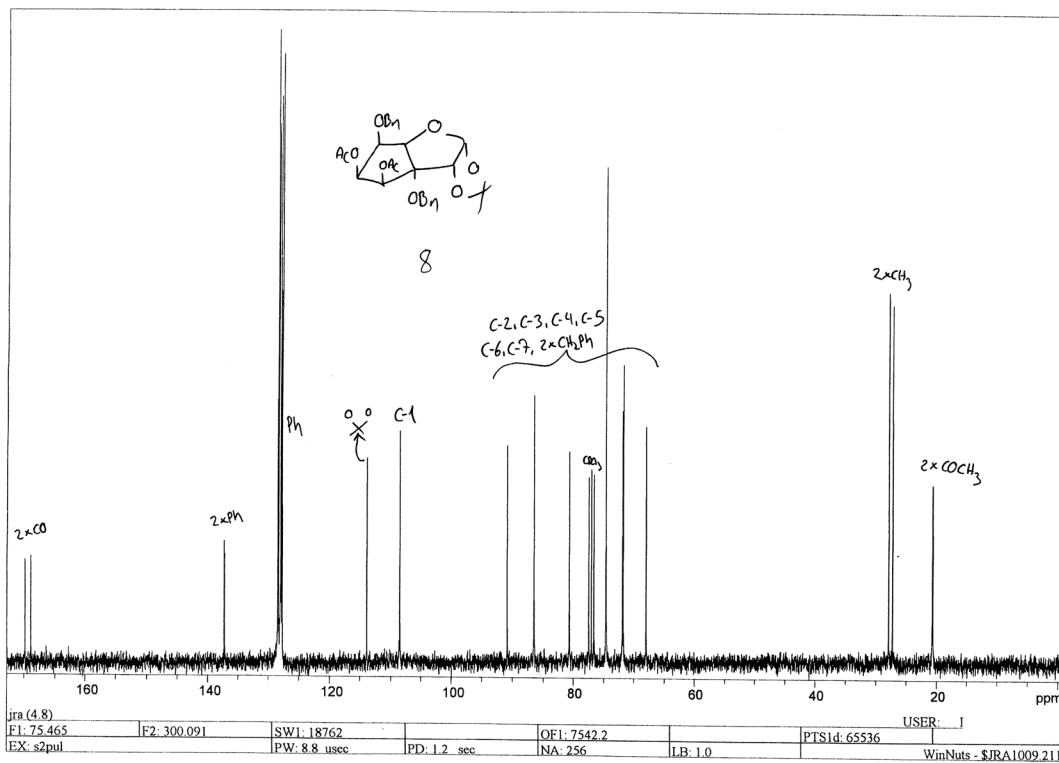

<sup>13</sup>C NMR spectrum of compound 8

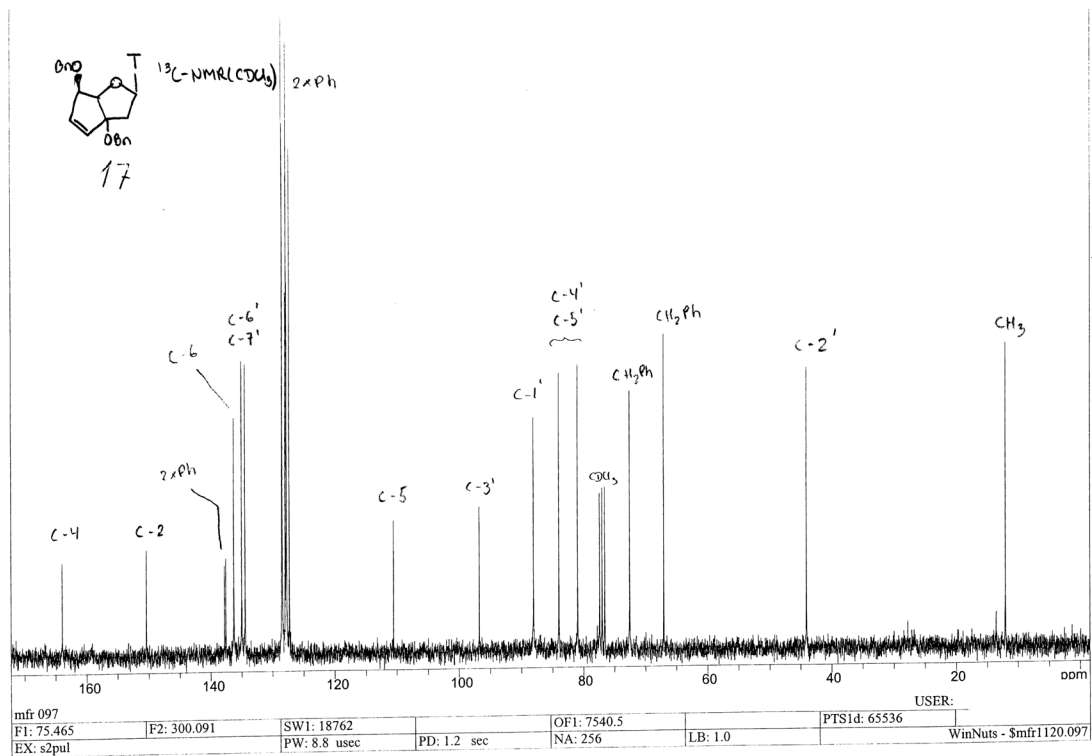

<sup>13</sup>C NMR spectrum of compound 17

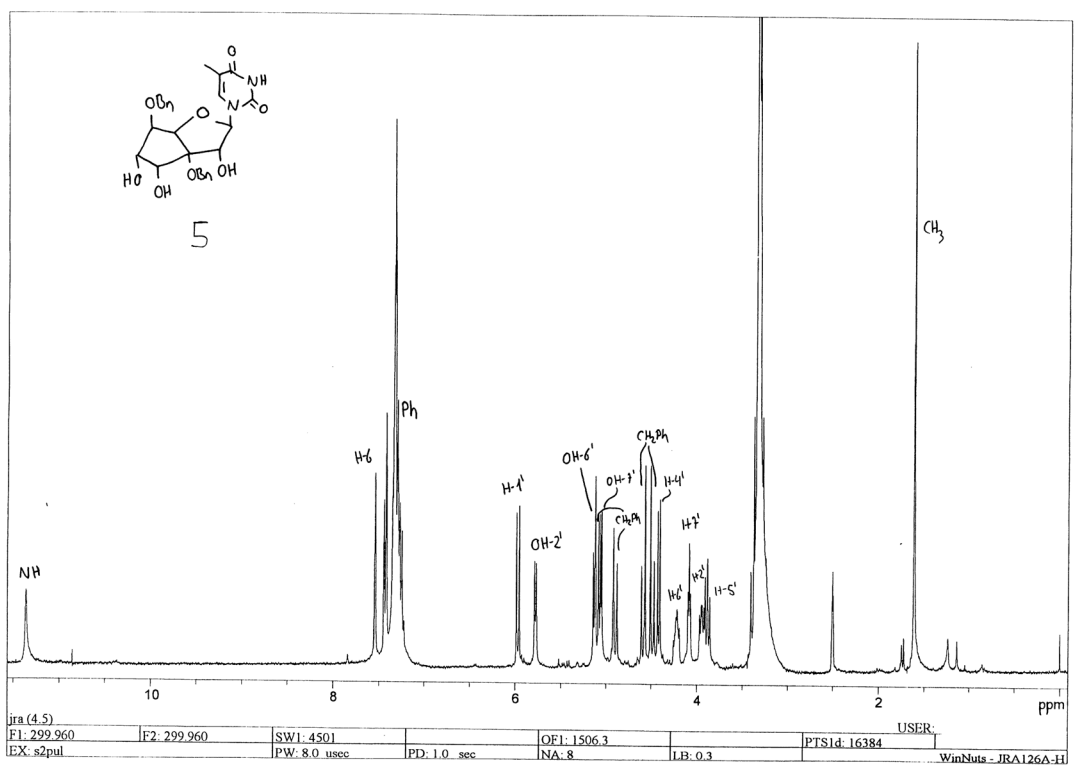

<sup>1</sup>H NMR spectrum of compound 5

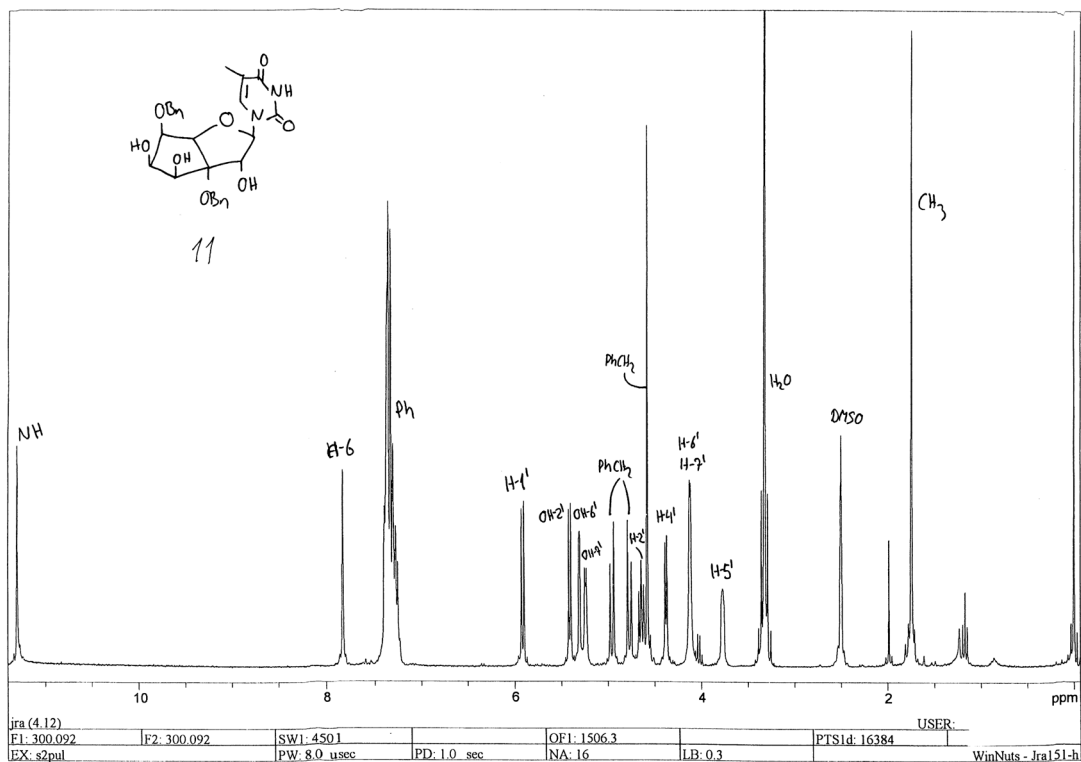

<sup>1</sup>H NMR spectrum of compound 11

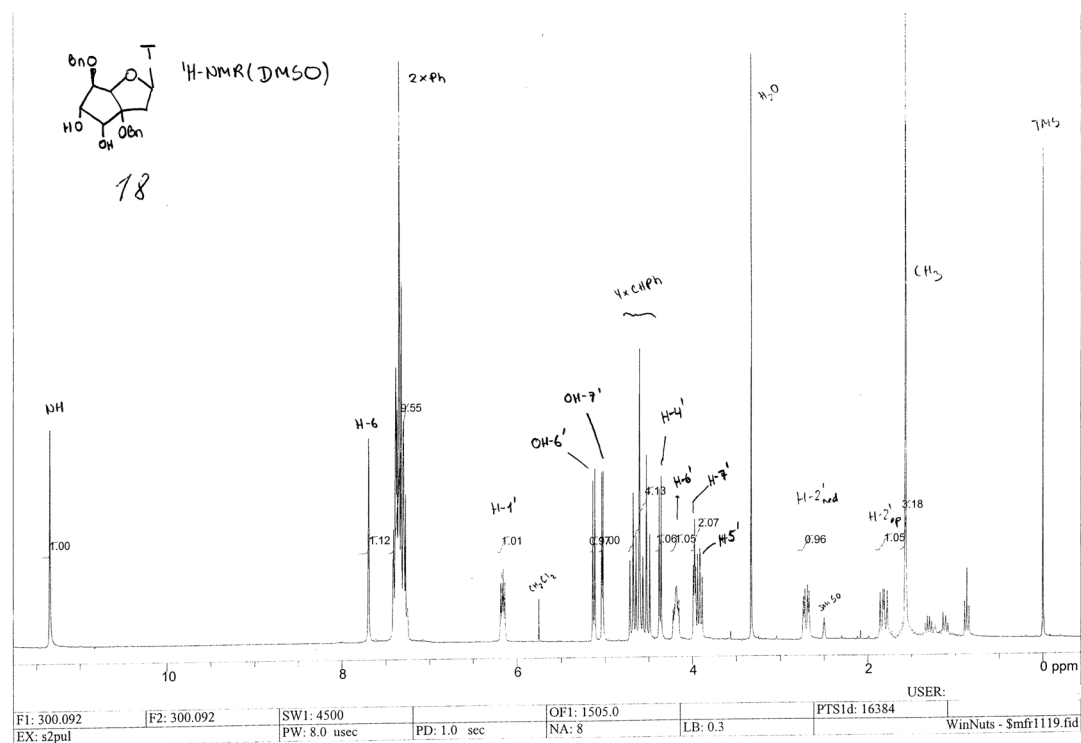

<sup>1</sup>H NMR spectrum of compound 18
